# Supplementary material for: Genetically Blocking the Zebrafish Pineal Clock Affects Circadian Behavior
Source: PubMed Central journal article supplement (PMC5147766; doi:10.1371/journal.pgen.1006445), 2016-11-21
Supplement: pgen.1006445.s009.pdf [file pgen.1006445.s009.pdf]

S9 Fig. Detailed sequence of the *pT2-*aanat2*:EGFP-2A- $\Delta$ clocka-5 $\times$ MYC* transgenic construct. Color coding as indicated.

**Underlined: pT2KXIG $\Delta$ in vector backbone**

**zebrafish *aanat2* Pineal-Restrictive Downstream Module (PRDM)**

1.65 kb of the 5'-flanking region and the 5'-UTR of zebrafish *aanat2*

**EGFP CDS**

**2A peptide linker**

**$\Delta$ CLK CDS (encoding the first 396 amino acids of zebrafish CLOCKa)**

**5 $\times$  Myc tag**

**SV40 poly(A) signal**

...CAGAGGTGTA AAAAGTACTCAAAAATTTTACTCAAGTGAAAGTACAAGTACTTAGGGAAAATTTTACTCAATTA AAAAGTAAAAGTATC  
TGGCTAGAATCTTACTTGGTAAAGTAAAAGTACTCCATTA AAAATTTGACTTGGAGTATTAAGGAAGTAAAAGTAAAAGCAAGAAAG  
AAAAGTAAAGTATCTTGTGTTAAGCTTTTAATCTCAAAAACATTA AATGAAATGCATACAAGGTTTATCCTGCCTTAGAACTGTTTGT  
ATTTAATTATCAAACTATAAGACAGACAATCTAATGCCAGTACACGCTACTCAAAGTTGTAAAACCTCAGATTTAACTTCAGTAGAAGC  
TGATTCTCAAAATTTGTTAGTGTCAAGCCTAGCTCTTTTGGGGCTGAAAAGCAATCCTGCAGTGCAGAAAAGCCTCTCACAGGCAGCCGA  
TGCGGGAAGAGGTGATTAGTCTTGATAGAGAGGCTGCAAATAGCAGGAAACGTGAGCAGAGACTCCCTGGTGTCTGAAAACACAGGCCA  
GATGGGCCCTCTGCTAACCATGTTTCATGCCTTCTTCTCTTTCTTACAGCTCCTGGGCAACGTGCTGGTTGTTGTCTGTCTCATCATT  
TTGGCAAAGAATTCCTCGACGGATCC**TCGAGACACCGCAGTATATATCACACTCTTCAAAAAGCTGGCACATTTGATCAGATTATCTGCC**  
**TTTAGAAACAGCTGACACTCGAAGGAGATGCTGCCGTTTCCAGCCGCATGATCTGTAGTAGTAATCAAAGAGAGTGTACGCTGAGCTGC**  
**ACTTTGGCTCTTTGCTTTTTCTTAAGAAGGCTCAGTAGATTAATACCTCGGCAGTGCCTCTGTCCACACCTTCACTATCACGCTTGA**  
**AACACCCTTGAAGTTGAATTCGCAGTCGACTCGATCATATTTCTAGACCTGGTAAGA ACTCTGGCAGCTGCATTTTGTACTAATTGA**  
AGTTTCGTTAATFGAGGATGCTGGGCTGCCGCAACAGATCATTAGAGTAGTCCAGCCTAGAAGTCATAAAAAGTATFGACTAACTTGA  
GCACCATCTGCTGTTAAAATCTATCCTAGAGTGCCACGTGCTGTTAAAACCTGGCATAGCCTAGAGGCCATCTGCTGTTAAAAGCTAG  
CCTAGAATGCCATTTTATGTTAAAACCTAGCCTAATGCACCATCTGCTAGTAAAACCTAAAGTAGCCTAGAACCACCTCTGGTGGTAAA  
AACTAACCTAGACTGCCACCTTGTGTTAAAACCTAAGGTAGTCCAGAACGCCATCTGGTGGTAAAACCTAGTCTAGAATCTCATTTTCT  
GTTAAAACCTAGTCTAGAGCACCATCTGCCAGTAAAACCTAACCTGGATTGCCATCTGCTGTTAAAACCTATGGTGGCTAGAGCACC  
GTTCTGGTAAAACCTAGAGTAGCCTAGAGCGCCATCTGCTGTTAAAACCTAACCTGGATTGCCATCTGCTGTTAAAACCAAGTGTAGC  
CTAGAGCAACAAGTTCTGGTAAAACCTAGAGTAGCCTAGAGCGCCATGCCCTGCTAAAACCTAACCTGGATTGCCATGTGCTGTTAAA  
ACCCGAGTGTAGCCTAGAGCAACAAGTTCTGGTAAAACCTAGAGTAGCCTAGAGCGCCATCTGCTGTTAAAACCTAACCTGGATTGCC  
TCTGCTGTTAAAACCAAGTGTAGCCTAGAGCAACAAGTTCTGGTAAAACCTAGAGTAGCCTAGAGCGCCATCTGCTGTTAAAACCTAACCT  
GGATTGCCATCTGCTGTTAAAACCAAGTGTAGCCTAGAGCAACAAGTTCTGGTAAAACCTAGAGTAGCCTAGAGCGCCATCTGCTGTT  
AAAACCTAACCTGGATTGCCATCTGCTGTTAAAACCAAGTGTAGCCTAGAGCAACAAGTTCTGGTAAAACCTAGAGTAGCCTAGAGCG  
CCTTCTGCTGTTAAAACCTAACCTGGATTGCCATCTGCTGTTAAAACCAAGTGTAGCCTAGAGCAACAAGTTCTGGTAAAACCTAGAG  
TAGCCTAGAGCACCATCTGCTGTTAAAACCTAAGCTCAGAATCAATTCAAGAGAGCAGTTTGATATTTTTTTCAGAAGTGATGCAGAAGCA  
ATTTCTCAAATGTGATTTGTCCACAGCTCTAATAGATGTTTTATTTTTTGGAGCTTCATTCCGAAGTTAGGACTATAACACTTCTGTT  
AATTGTACCTGTGGGTTTTATTTATCATCTGACAATCTCATCCATGACCCATGACTAGTTCTCACTGTCTTAATTTCTGCGGCTTGAT  
GAATTTGGAACTGCAGATATGAAAAGCAAGCAGGACTGGCTTAACAGCGCAAGCTTTTCTGCTGGCTGTACAAACAGTTTCTGGTAA  
GTGTTTGGAGAGGCTGATCAGCTGCGGTTGAGTACCACAGGCTTTTTCAGCTCACAGACTTTTAGGGAATTGCTGCATCTTACCCTGGCA  
CGTGTGCGCACTTTAGGAGATCAGGGGCGGGCTGGA AAAACAGACGGGATGAGGGGAGGTTAAAGGCGAGGAGAGGTGATAGGATTCAA  
ACACATCACACCACTGAGACGAGCAGACAAATCCACCAACAGACAGACTGAAGTTTCTAAAAGTCAGGAGCTCGGGTTAGTTTGGTCA  
GTACAGTATTGTCTAAAAGTGTGCGGCTGTCA**GGATCCACCGGTCGCCACCATGGTGAGCAAGGGCGAGGAGCTGTTCAACCGGGTGGTG**  
**CCCATCTGGTTCGAGCTGGACGGCGACGTAACCGGCCACAAGTTTCAGCGTGTCCGGCGAGGGCGAGGGCGATGCCACCTACGGCAAGCT**  
**GACCCTGAAGTTTCATCTGCACCACCGGCAAGCTGCCCGTCCCTGGCCACCCTCGTGACCACCTGACCTACGGCGTGCAGTGTCTCA**  
**GCCGCTACCCGACCACATGAAGCAGCAGACTTCTTCAAGTCCGCCATGCCGGAAGGCTACGTTCCAGGAGCGCACCATCTTCTTCAAG**  
**GACGACGGCAACTACAAGACCCGCGCCGAGGTGAAGTTTCGAGGGCGACACCCCTGGTGAACCGCATCGAGCTGAAGGCATCGACTTCAA**  
**GGAGGACGGCAACATCCTGGGGCACAAGCTGGAGTACAACCTACAACAGCCACAACGCTCTATATCATGGCCGACAAGCAGAAGAACGGCA**  
**TCAAGGTGAACCTCAAGATCCGCCACAACATCGAGGACGGCAGCGTGCAGCTCGCCGACCCTACCAGCAGAACACCCCATCGCGGAC**  
**GGCCCCGTGCTGCTGCCGACAACTACTTACGACCCAGTCCGCCCTGAGCAAAGACCCCAACGAGAAGCGGATTCATGTTCTCT**  
**GCTGGAGTTCGTGACCGCCGCGGGATCAGTCTCGGCATGGACGAGCTGTACAAGGGCTCCGGAGCCACGAACCTCTCTCTGTTAAAGC**  
**AAGCAGGAGAGCTGGAAGAAAACCCCGGTCCTATGACCTCCAGCATAGACCGGGATGACAGCAGTATCTTTGATGGGTTAATGGAAGAA**  
**GATGAGAAGGACAAAGCAAAAAGAGTTCTAGAAATAGGTCCGAGAAGAAGAGGCGAGACCAGTTCAATGTGCTCATCAAGGAACCTGGG**  
**CACCATGTTGCCGGCAACACCCGCAAGATGGACAAGTCTACCATCCTACAGAAGAGCATCGACTTCTGCGCAAGCACAAGAAATTTG**  
**CTGCACAGTCGGAGTCGAGTGAATCCGTCAGGACTGGAAGCCACCCTTCTTAGCAATGAGGAGTTCACACAGCTGATGCTGGAGGCA**

CTAGATGGCTTCTTTCTGGCCATTATGACGGATGGAAACATAATCTACGTCTCAGAAAGTGTACAGTCTTTATTAGAACATCTACCTTC  
TGATCTTGTGGATCAGAACCCTGTTGAATTTCCCTTCCACTGGGTGAGCATTCCGGAGGTGTATAAAGCTCTGTCAACACACATGTTGGAGG  
GAGAAACCCCTACCCCAGACTACCTAAAGACAAAGAACCAGTTGGAGTTTTGTTGCCACATGCTCCGGGGCACCATCGACCCCAAAGAG  
CCGCCCGTTTTATGAATATGTCAAGTTCATCGGAACTTTAAGTCCCTCAACACTGTGCCTAACTCAACACGAAACGGCTTTGAGGGAGT  
GATCCAGCGATCGCTGCGACACGCGTTTTGAAGACCGAGTGTGTTTCATAGCGACGGTCAGGCTAGCCAAACCTCAGTTTATCAAGGAAA  
TGTGTACTGTGGAGGAGCCCAATGAGGAATTCACCTCCAGACACAGTTTAGAGTGGAAATTCCTCTTCTTGGACCACAGGGCGCCTCCT  
ATCATTGGTTACCTGCCGTTTTGAGGTTCTGGGTACTTCAGGGTACGACTACTATCATGTGGATGACCTGGAGACTTTGGCCAAATGCCA  
CGAACACTTGATGCAGTACGGTAAGGGGAAGTCGTGCTATTACCGTTTTCTGACTAAAGGTCAGCAGTGGATCTGGCTTCAGACGCACT  
ACTACATCACCTACCACAGTGGAACTCAAGGCCAGAGTTCATCGTCTGCACCTCACACGGTGGTCAGTTATGCTGAAGTGAGAGCTGAA  
CAGCGCAGAGAGCTGGGCATTGAAGAATCACCTCCTGAGATCTCCGCAGACAAGTCTCAGGACTGCGATCGATTTAAAGCTATGGAGCA  
AAAGCTCATTTCTGAAGAGGACTTGAATGAAATGGAGCAAAGCTCATTTCTGAAGAGGACTTGAATGAAATGGAGCAAAGCTCATTT  
CTGAAGAGGACTTGAATGAAATGGAGCAAAGCTCATTTCTGAAGAGGACTTGAATGAAATGGAGCAAAGCTCATTTCTGAAGAGGAC  
TTGAATGAAATGGAGAGCTTGGGCGACCTCACCATGTGACATATGATGATCCAGACATGATAAGATACATTGATGAGTTTGGACAAACC  
ACAAC TAGAATGCAGTGA AAAAATGCTTTATTTGTGAAATTTGTGATGCTATTGCTTTATTTGTAACCATTATAAGCTGCAATAACA  
AGTTAACAACAACAATTGCATTCATTTTATGTTTCAGGTTTCAGGGGGAGGTGTGGGAGGTTTTTTAAAGCAAGTAAACCTCTACAAAT  
GTGGTATGGCTGATTATGATCCTCTAGATCAGATCTGCGAAGATACGGCCACGGGTGCTCTTGATCCTGTGGCTGATTTTGGACTGTGC  
TGCTCGCAGCTGCTGATGAATCACATACTTCCATTTTCTTCCACTGATTGACTGTTATAATTTCCCTAATTTCCAGGTCAAGGTGC  
TGTGCATTGTGGTAATAGATGTGACATGACGTCACCTTCAAAGGACCAATGAACATGTCTGACCAATTTCATATAATGTGAAAACGATT  
TTCATAGGCAGAATAAATAACATTTAAATTAACCTGGGCATCAGCGCAATTC AATTGGTTTGGTAATAGCAAGGGAAAATAGAATGAAG  
TGATCTCCAAAAATAAGTACTTTTGGACTGTAAATAAAATTTGAAGGAGTAAAAGTACTTTTTTTCTAAAAAATGTAATTAAGTA  
AAAGTAAAAGTATTGATTTTTAATTGACTCAAGTAAAGTAAAATCCCCAAAAATAATACTTAAGTACAGTAATCAAGTAAAATTACT  
CAAGTACTTTACACCTCTG..
